# Supplementary material
Source: publisher figshare collection journal article supplement (https://acs.figshare.com/ndownloader/files/4681975)
Supplement: Supplementary file 1 [file 4681975]

**Supporting information:**

I. Field-swept echo spectra of anatase nano-object under 355 nm illumination obtained with Bruker Elexsys E580 spectrometer equipped with a dielectric MD4 cavity and an Oxford CF935 helium flow cryostat with ITC-5025 temperature controller. The first ( $\pi/2$ ) and second ( $\pi$ ) pulse durations were 16 and 32 ns, respectively. Changing the time between pulses ( $\tau$ ) from 100 to 400 ns did not affect spectra.

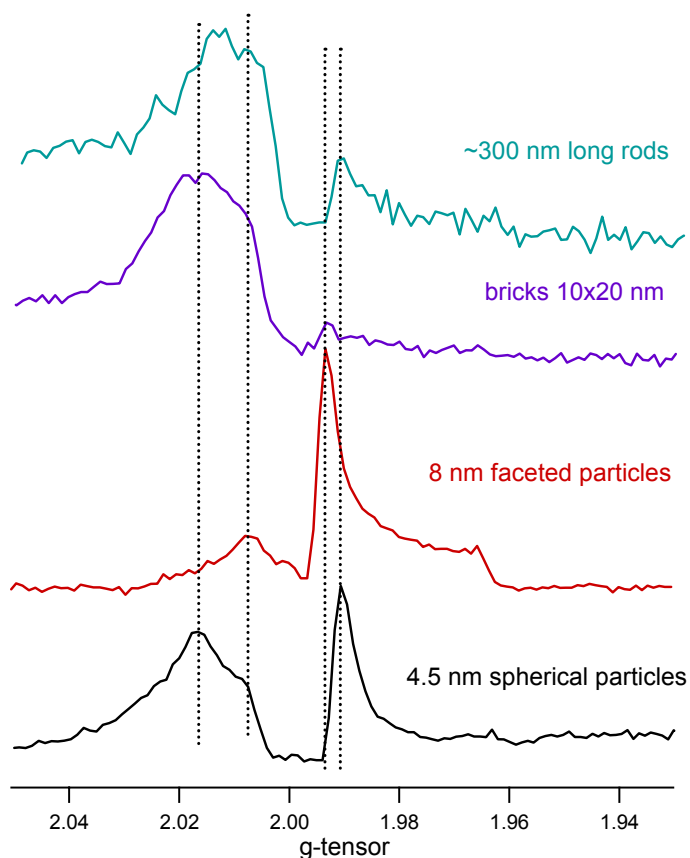

II. g-tensor values and spin-spin relaxation times of photogenerated charges in anatase nano-objects.

Table 1: EPR Parameters of the g Matrix for Paramagnetic Species formed upon Band Gap Excitation of Anatase Nano-objects

| Nano-objects                  | Electrons, $(\text{Ti}^{3+})_{\text{latt}}$ |                   |                   | Holes, $(\text{Ti}^{4+}\text{O}\bullet)_{\text{surf}}$ |       |       |
|-------------------------------|---------------------------------------------|-------------------|-------------------|--------------------------------------------------------|-------|-------|
|                               | $g_{\perp}$                                 | $g_{\parallel}^1$ | $g_{\parallel}^2$ | $g_z$                                                  | $g_y$ | $g_x$ |
| Spherical particles (< 10 nm) | 1.990                                       | 1.961             | 1.958             | 2.007                                                  | 2.014 | 2.024 |
| Faceted particles (< 10 nm)   | 1.993                                       | 1.964             | -                 | 2.007                                                  | 2.015 | 2.024 |
| Rods (50x300 nm)              | 1.990                                       | 1.961             |                   | 2.007                                                  | 2.014 | 2.024 |
| Brick-like particles (10x20)  | 1.993                                       | 1.964             | -                 | 2.007                                                  | 2.015 | 2.024 |

Table 2: Spin-spin ( $T_2$ ) Relaxation Times for Paramagnetic Species at 7 K Formed upon Band Gap Excitation of Anatase Nano-objects

| Nano-objects                        | Electrons, $(\text{Ti}^{3+})_{\text{latt}}$ | Holes, $(\text{Ti}^{4+}\text{O}\bullet)_{\text{surf}}$ |
|-------------------------------------|---------------------------------------------|--------------------------------------------------------|
| Spherical particles (4.5 nm)        | $(155 \pm 4)$ ns                            | $(2.2 \pm 0.2)$ $\mu$ s                                |
| Spherical particles ( $\sim 10$ nm) | $(155 \pm 4)$ ns                            | $(2.2 \pm 0.2)$ $\mu$ s                                |
| Faceted particles (< 10 nm)         | $(1.5 \pm 0.2)$ $\mu$ s                     | $(1.5 \pm 0.3)$ $\mu$ s                                |
| Rods (50x300 nm)                    | $(2.0 \pm 0.3)$ $\mu$ s                     | $(2.2 \pm 0.3)$ $\mu$ s                                |
| Brick-like particles (10x20 nm)     | $(2.0 \pm 0.3)$ $\mu$ s                     | $(1.5 \pm 0.1)$ $\mu$ s                                |
